# Supplementary material for: A global view of Pc3 wave activity in near-Earth space: Results from hybrid-Vlasov simulations
Source: Frontiers journal article supplement (doi:10.3389/fspas.2022.989369), 2022-09-29
Supplement: Data_Sheet_1.PDF [file Data_Sheet_1.PDF]

# Supplementary Material

## 1 SUPPLEMENTARY TABLES AND FIGURES

### 1.1 Figures

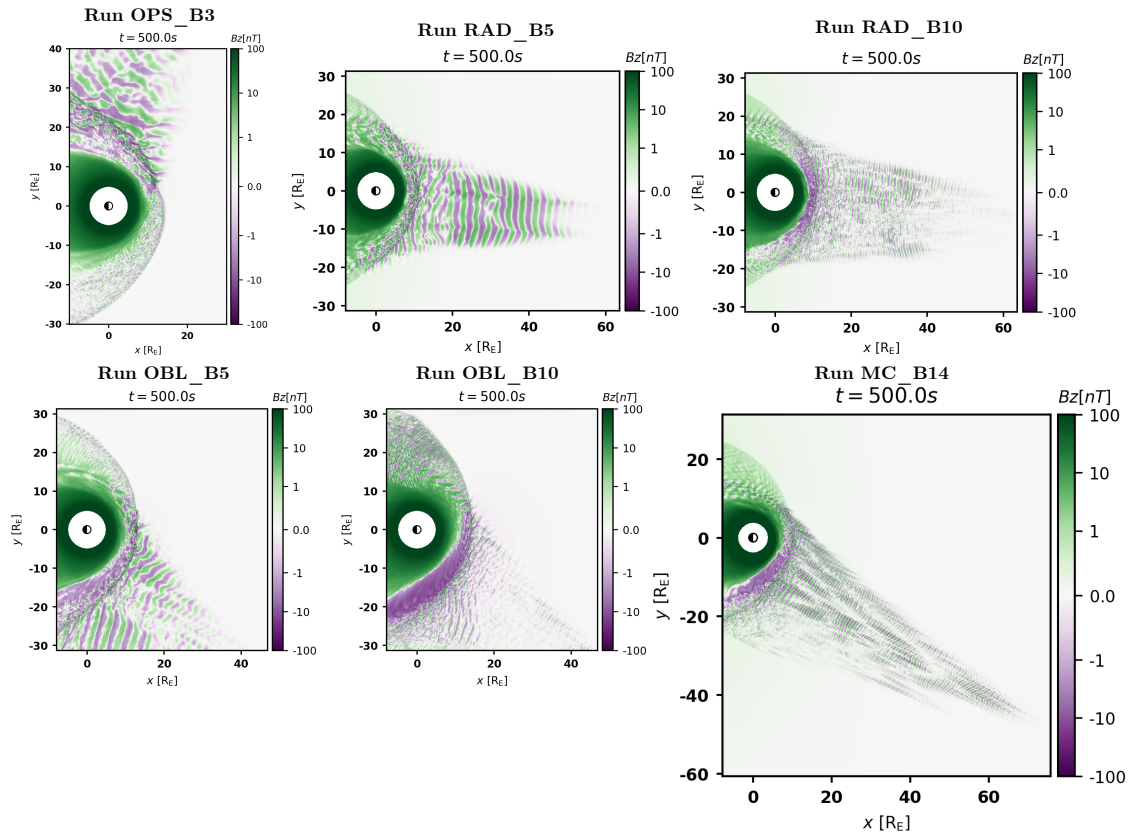

**Figure S1.**  $B_z$  magnetic field component in the runs under study at  $t = 500$  s from the beginning of the simulation, in the entire simulation domain. This figure is similar to Figure 1 in the paper, but we show here the full extent of the simulation domain in each run.
